# Supplementary material
Source: publisher figshare collection journal article supplement (https://springernature.figshare.com/ndownloader/files/21801399)

**Highlight**

∙MS performs label-free enzyme assays and is generally applicable

∙Direct sample introduction without chromatography enables high-throughput MS analysis

∙MS provides selectivity, sensitivity, and quantitation that are difficult for traditional assays

∙Possible solutions for addressing challenges in studying biofuel enzymes using MS

**Graphical abstract**


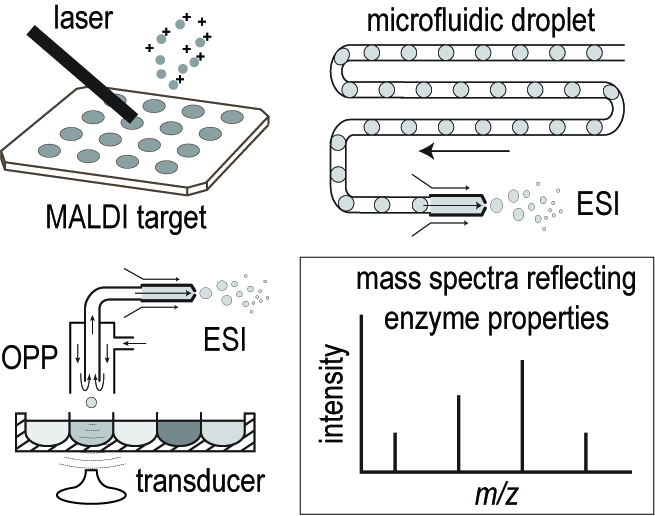

Supplement: Supplementary file 1 [file 21801399]
